# Supplementary material for: Performance Enhancement of Ce0.8Sm0.2O1.9-Supported SOFC by Electrophoretic Formation of Modifying BaCe0.8Sm0.2O3 and Ce0.8Sm0.1Pr0.1O1.9 Layers
Source: MDPI journal article supplement (doi:10.3390/membranes13050484), 2023-04-29
Supplement: s1 [file s1]

## Supplementary materials

# Performance enhancement of $\text{Ce}_{0.8}\text{Sm}_{0.2}\text{O}_{1.9}$ -supported SOFC by Electrophoretic Formation of Modifying $\text{BaCe}_{0.8}\text{Sm}_{0.2}\text{O}_3$ and $\text{Ce}_{0.8}\text{Sm}_{0.1}\text{Pr}_{0.1}\text{O}_{1.9}$ Layers

Elena Pikalova<sup>1,2</sup>, Elena Kalinina<sup>3,4\*</sup>

<sup>1</sup> Laboratory of Solid Oxide Fuel Cells, Institute of High Temperature Electrochemistry, Ural Branch of the Russian Academy of Sciences, Yekaterinburg 620137, Russia; e.pikalova@list.ru

<sup>2</sup> Department of Environmental Economics, Graduate School of Economics and Management, Ural Federal University, Yekaterinburg 620002, Russia; e.pikalova@list.ru

<sup>3</sup> Laboratory of Complex Electrophysic Investigations, Institute of Electrophysics, Ural Branch of the Russian Academy of Sciences, Yekaterinburg 620016, Russia; jelen456@yandex.ru

<sup>4</sup> Department of Physical and Inorganic Chemistry, Institute of Natural Sciences and Mathematics, Ural Federal University, Yekaterinburg 620002, Russia; jelen456@yandex.ru

\* Correspondence: jelen456@yandex.ru (E.K.); Tel.: +7-343-267-87-82 (E.K.)

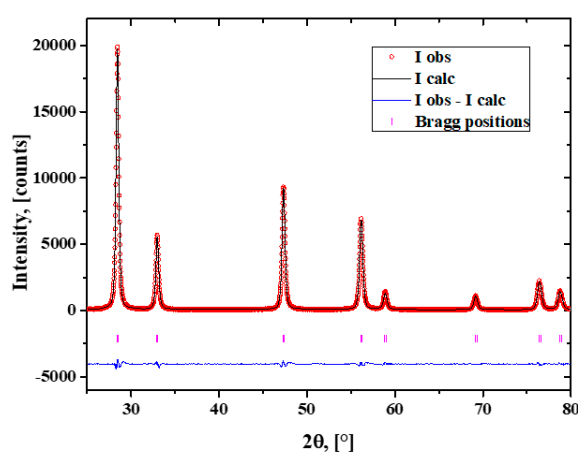

(a) SDC

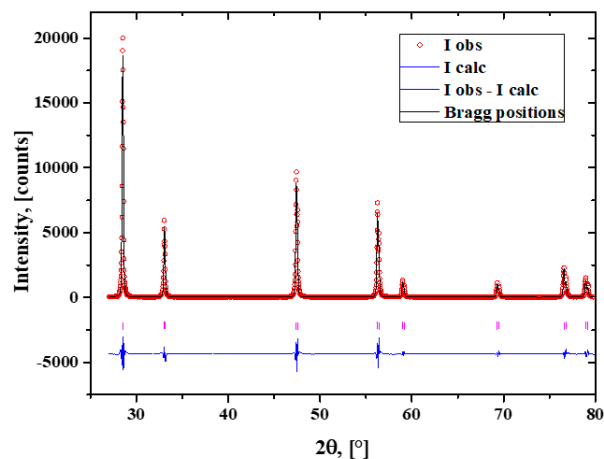

(b) PSDC

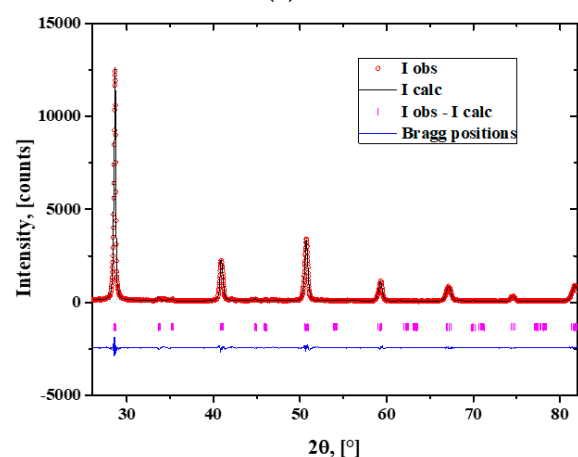

(c) BCS-CuO

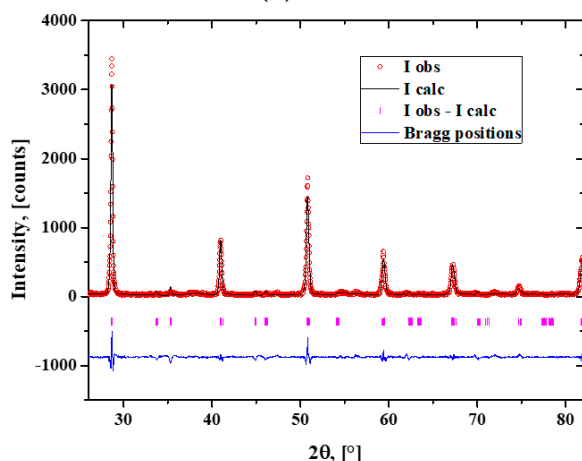

(d) BCGCu

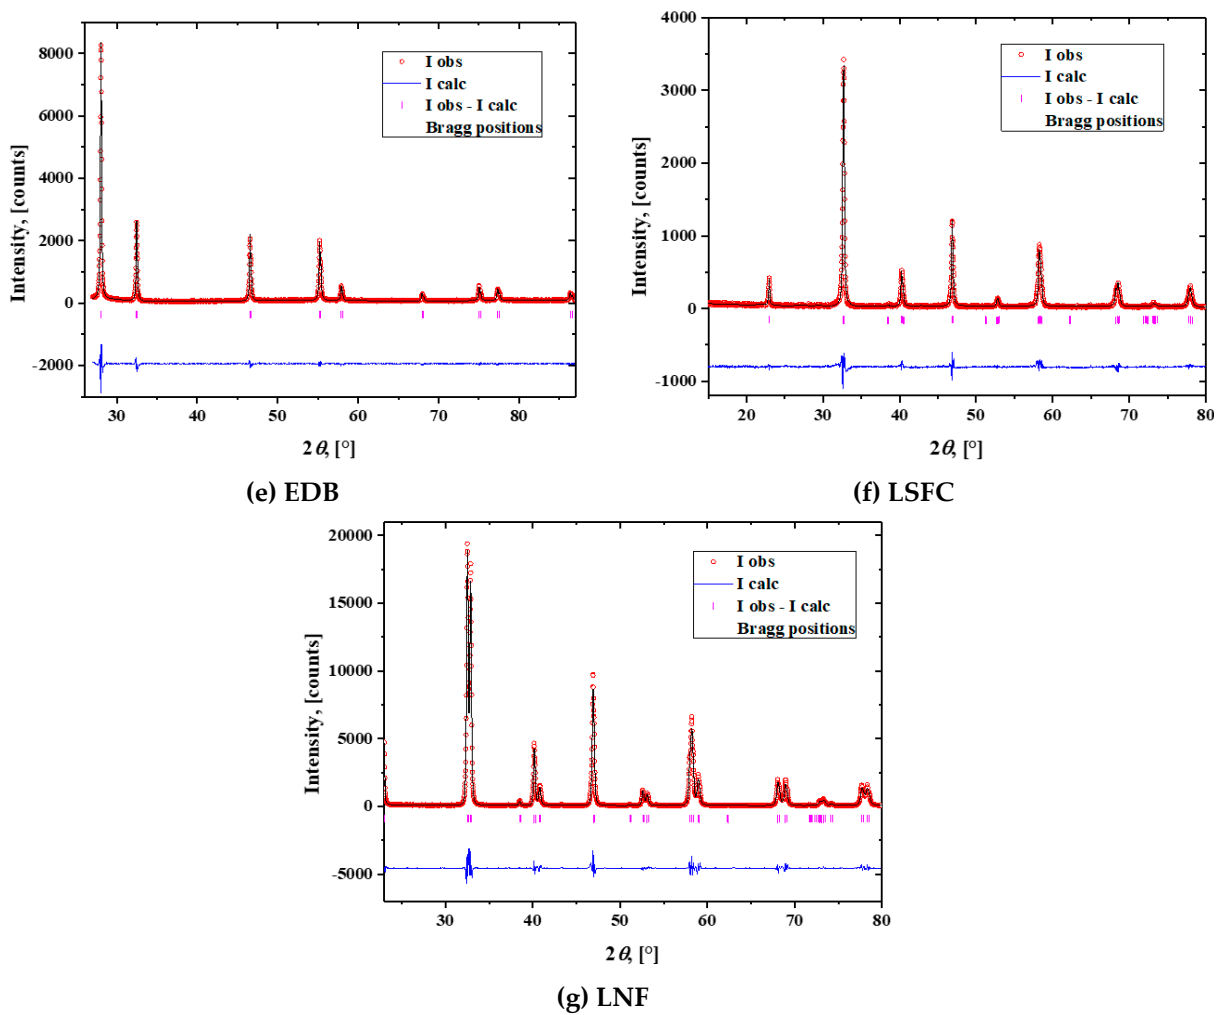

**Figure S1:** XRD patterns obtained for the powders after the final calcination/sintering step: (a) SDC powder (1600 °C); (b) PSDC powder (800 °C); (c) BCS-CuO powder (1150 °C); (d) BCGCu powder (1100 °C); (e) EDB powder (600 °C); (f) LSFC powder (1100 °C); (g) LNF powder (900 °C).

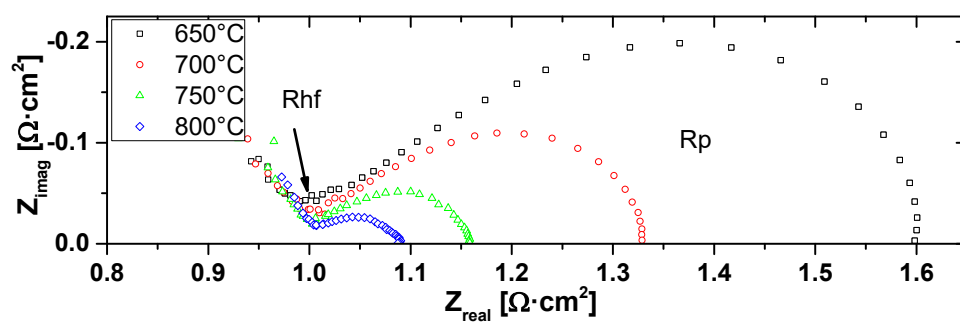

(a)

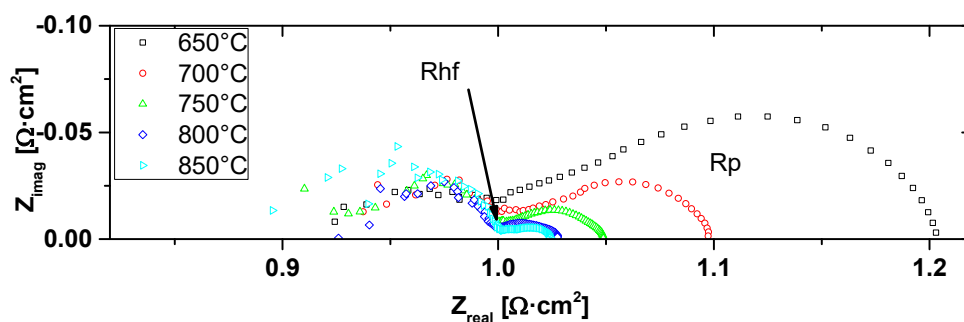

(b)

**Figure S2** Electrode response obtained under OCV conditions in the SOFC mode for the single cells with the Ni-BCGCu anode and the LSFC-SDC/LNF-EDB-CuO cathode and the supporting electrolyte membrane comprising with the BCS-CuO anode layer (18  $\mu\text{m}$ ) – (a); with the BCS-CuO anode layer (18  $\mu\text{m}$ ) and the PSDC cathode layer (6  $\mu\text{m}$ )

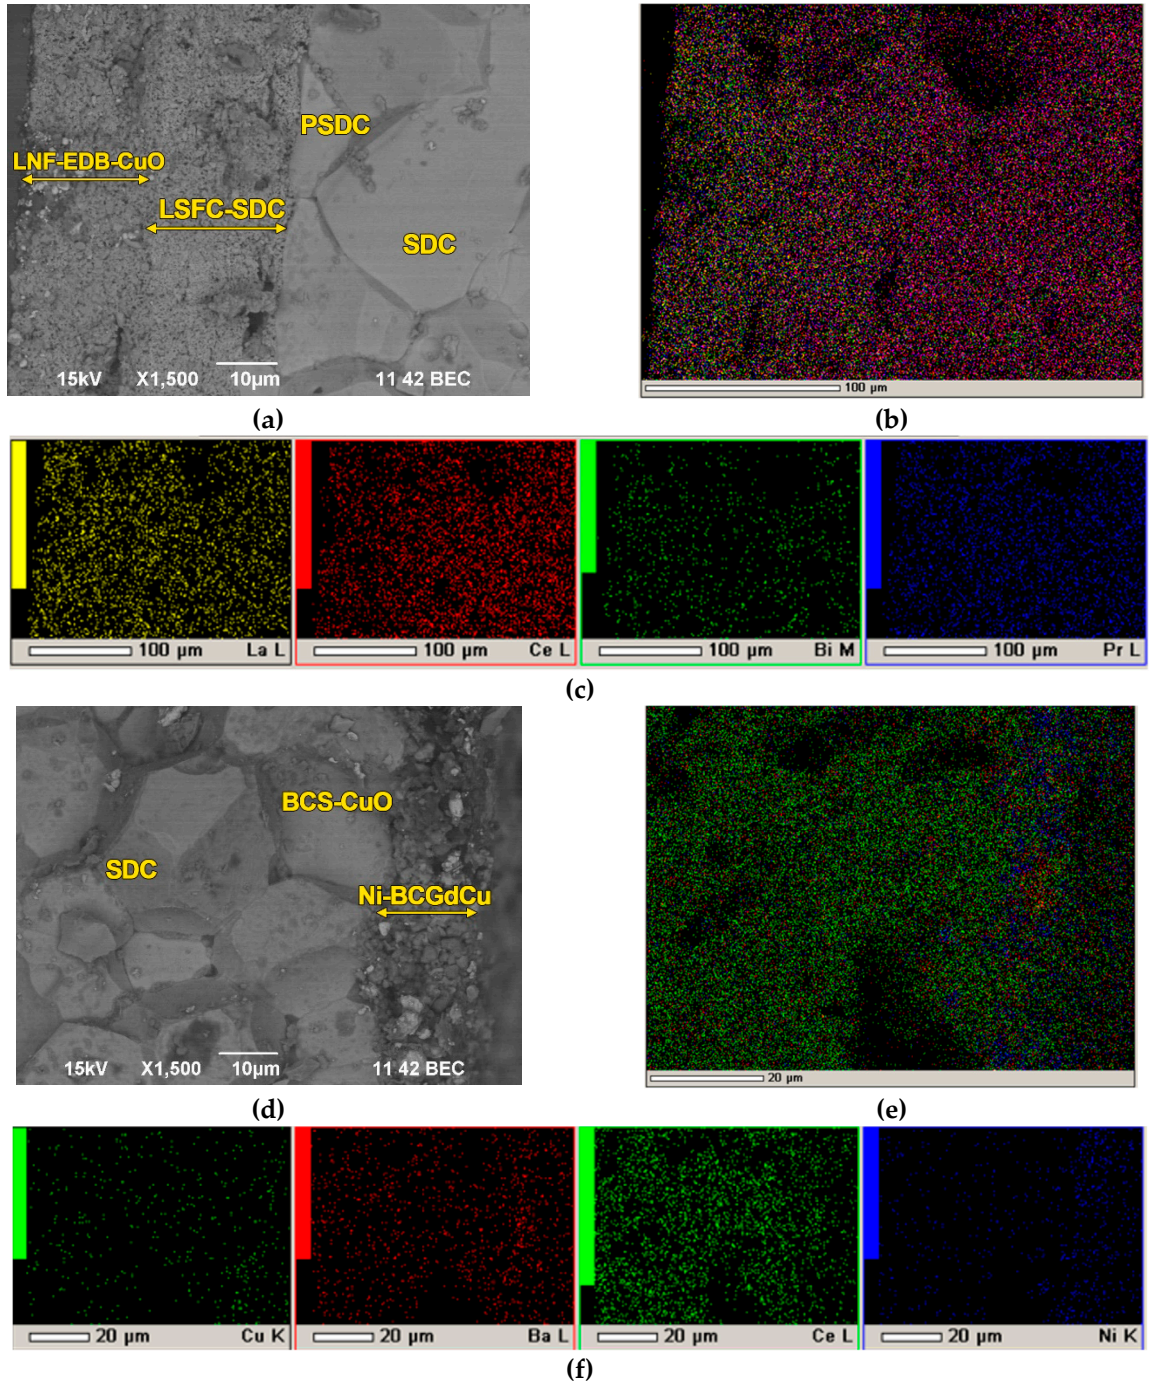

**Figure S3** Cross sectional images for the Ni-BCGdCu/BCS-CuO/SDC/PSDC/LSFC-SDC/LNF-EDB-CuO cell (SDC2 cell) after testing in the SOFC mode: SEM images obtained on the cathode side - (a), (b), (c); SEM images on the anode side - (d), (e), (f) Cross sectional SEM images, x1500 magnification - (a), (d); integrated maps of element distribution - (b), (e); individual maps of elements - (c), (f)
